# Supplementary material for: Graphene oxide reduction by standard industrial reducing agent: thiourea dioxide
Source: Royal Society of Chemistry journal article supplement (doi:10.1039/c2jm16054d), 2012-01-01
Supplement: c2jm16054d.pdf [file c2jm16054d.pdf]

## **Electronic Supporting Information**

# **Graphene oxide reduction by standard industrial reducing agent: Thiourea dioxide.**

Chun Kiang Chua, Adriano Ambrosi, Martin Pumera\*

*Division of Chemistry & Biological Chemistry, School of Physical and Mathematical Sciences,  
Nanyang Technological University, Singapore 637371, Singapore.*

\*Corresponding author

Prof Martin Pumera, Division of Chemistry & Biological Chemistry, School of Physical and Mathematical Sciences, Nanyang Technological University, 21 Nanyang Link, Singapore 637371, Singapore. Fax:(+65) 6791-1961; . E-mail: [pumera@ntu.edu.sg](mailto:pumera@ntu.edu.sg)

### Section 1: Experimental details

The reduction of Graphite-Ox with thiourea dioxide was investigated over a 1, 2, 5, 10 and 20 hours reaction. A control reaction with Graphite-Ox heated under hot caustic alkali solution, without any addition of thiourea dioxide was ran simultaneously for 2 hours. The results from the 1 hour reaction were reported in the main manuscript and the remaining samples are reported here in the supporting information.

In accordance with the reaction time, the samples were named as T2-CRGO for 2 hour reaction, T5-CRGO for 5 hour reaction etc. The control reaction was labelled as NaOH control.

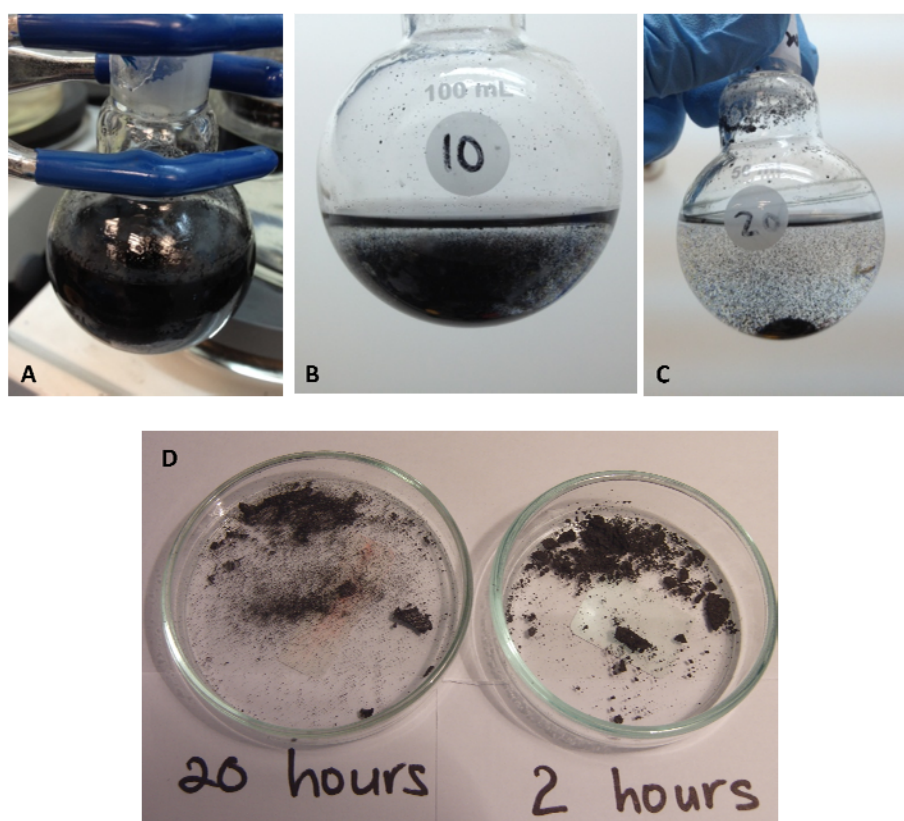

**Fig. S1** Photographs of reaction mixture upon completion of (A) 2 hours (B) 10 hours (C) 20 hours reaction time. (D) solid samples of 2 and 20 hours of reaction time.

## **Section 2: Characterisations**

### **Section 2.1 Morphological Characterisations**

#### **Transmission Electron Microscopy (TEM)**

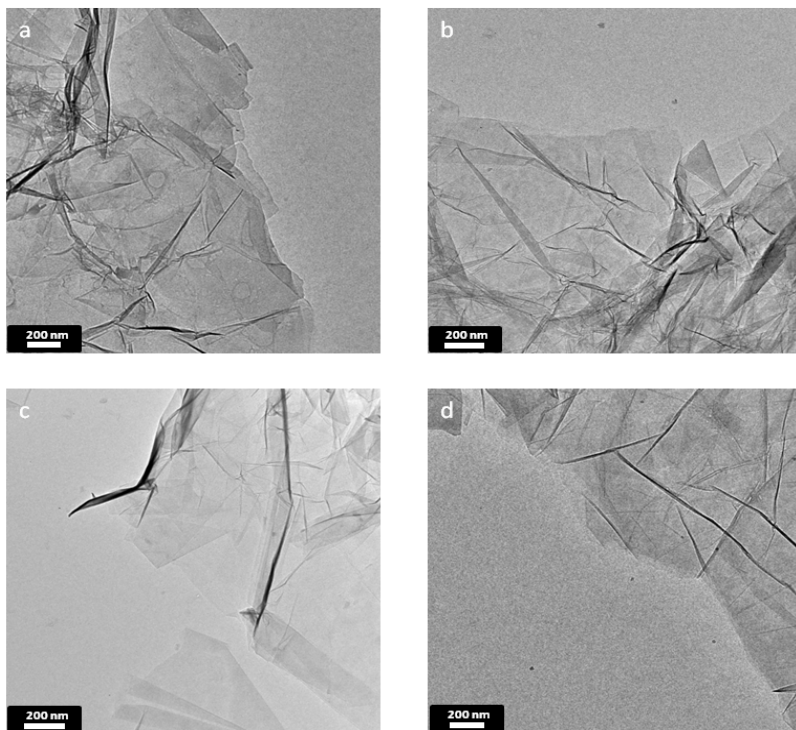

**Fig. S2** TEM images of (a) T2-CRGO (b) T5-CRGO (c) T10-CRGO (d) T20-CRGO.

#### **Scanning Electron Microscopy (SEM)**

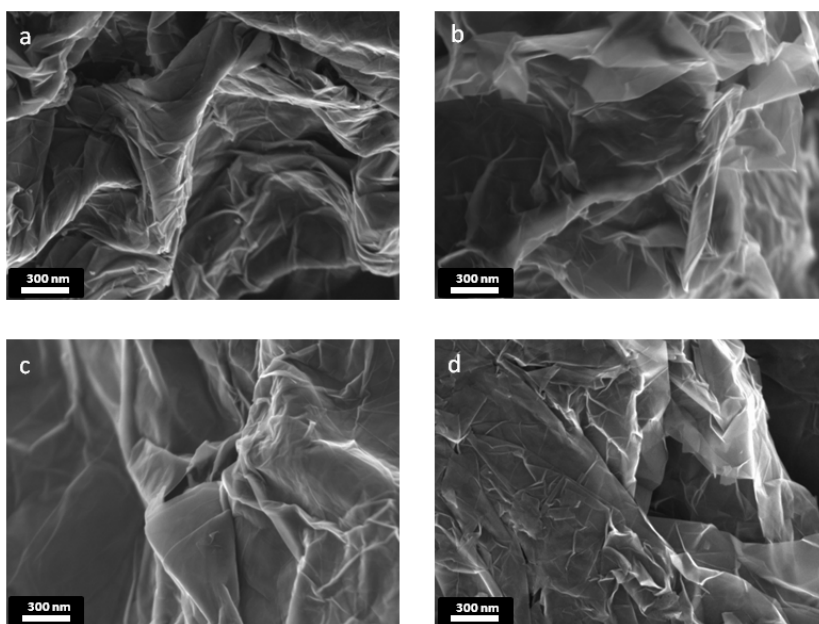

**Fig. S3** SEM images of (a) T2-CRGO (b) T5-CRGO (c) T10-CRGO and (d) T20-CRGO.

## Section 2.2 Structural Characterisations

### X-ray Photoelectron Spectroscopy (XPS)

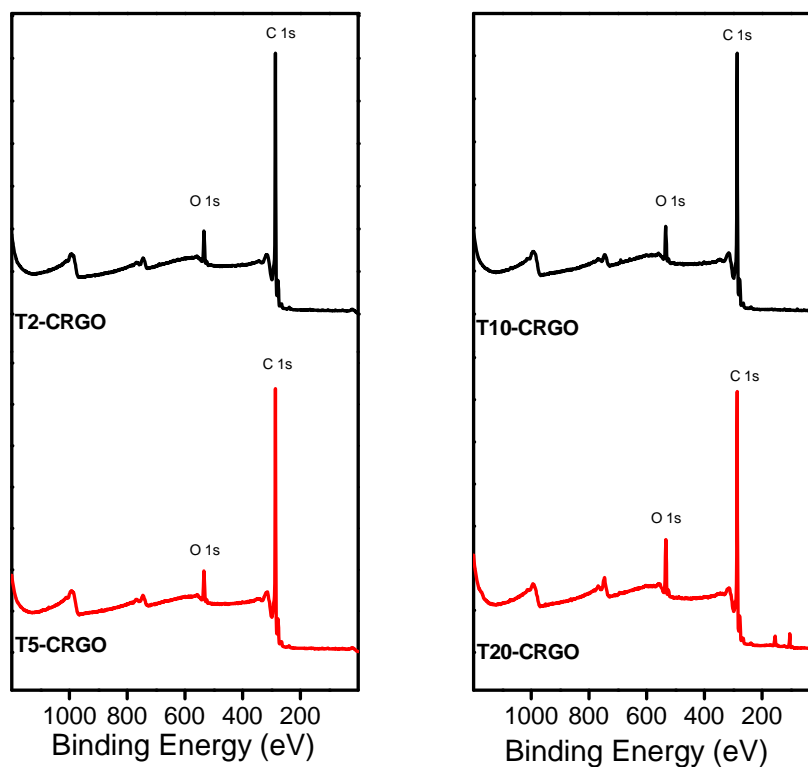

Fig. S4 XPS wide scan spectra of T2-CRGO, T5-CRGO, T10-CRGO and T20-CRGO.

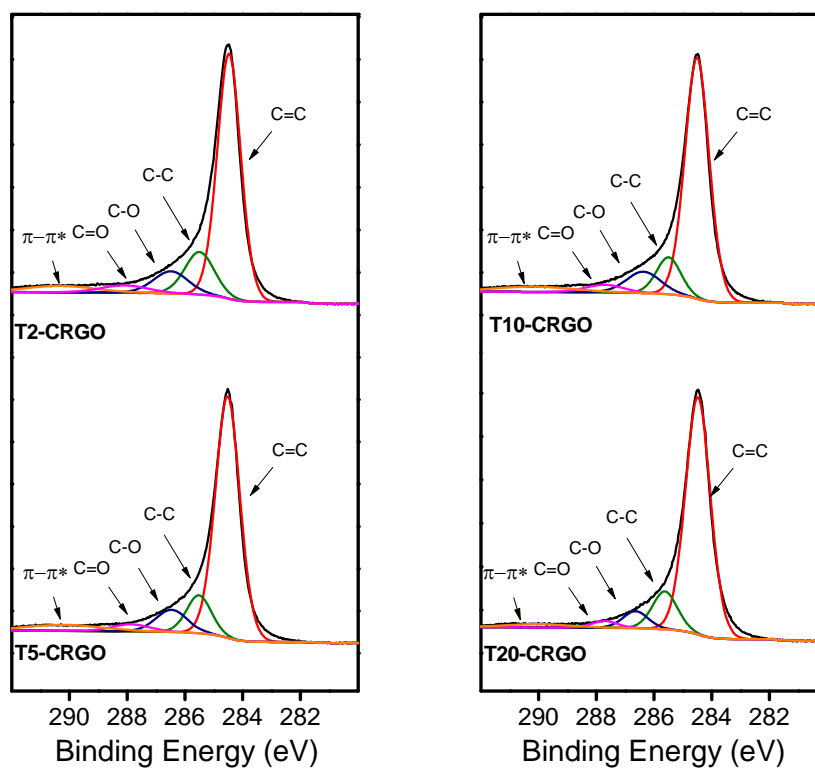

Fig. S5 XPS C1s core level spectra of T2-CRGO, T5-CRGO, T10-CRGO and T20-CRGO.

## Raman Spectroscopy

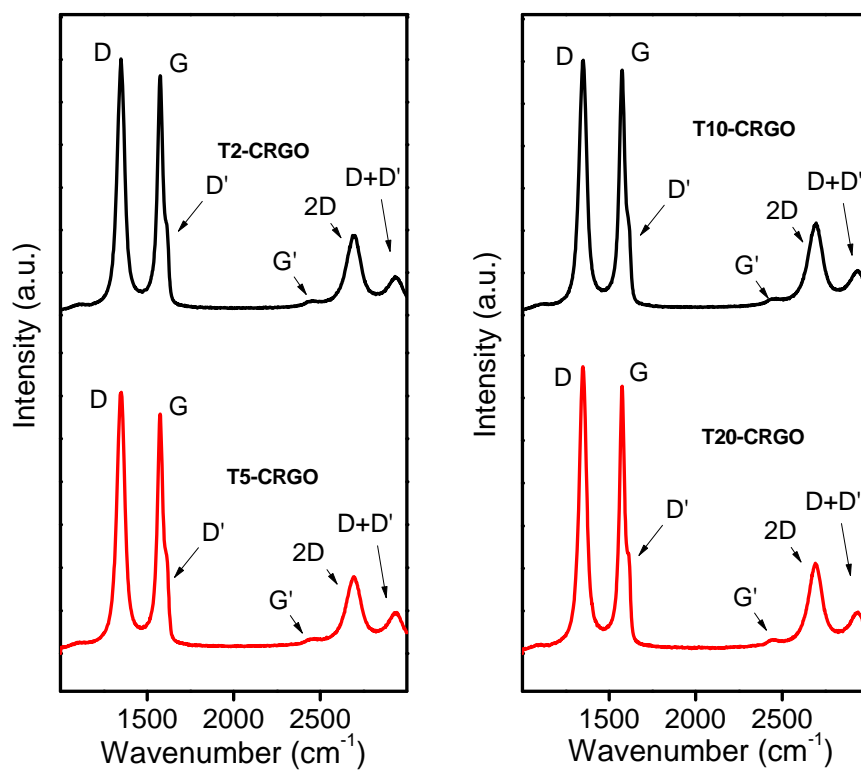

**Fig. S6** Raman spectra of T2-CRGO, T5-CRGO, T10-CRGO and T20-CRGO.

### Section 2.3 Electrochemical Characterisations

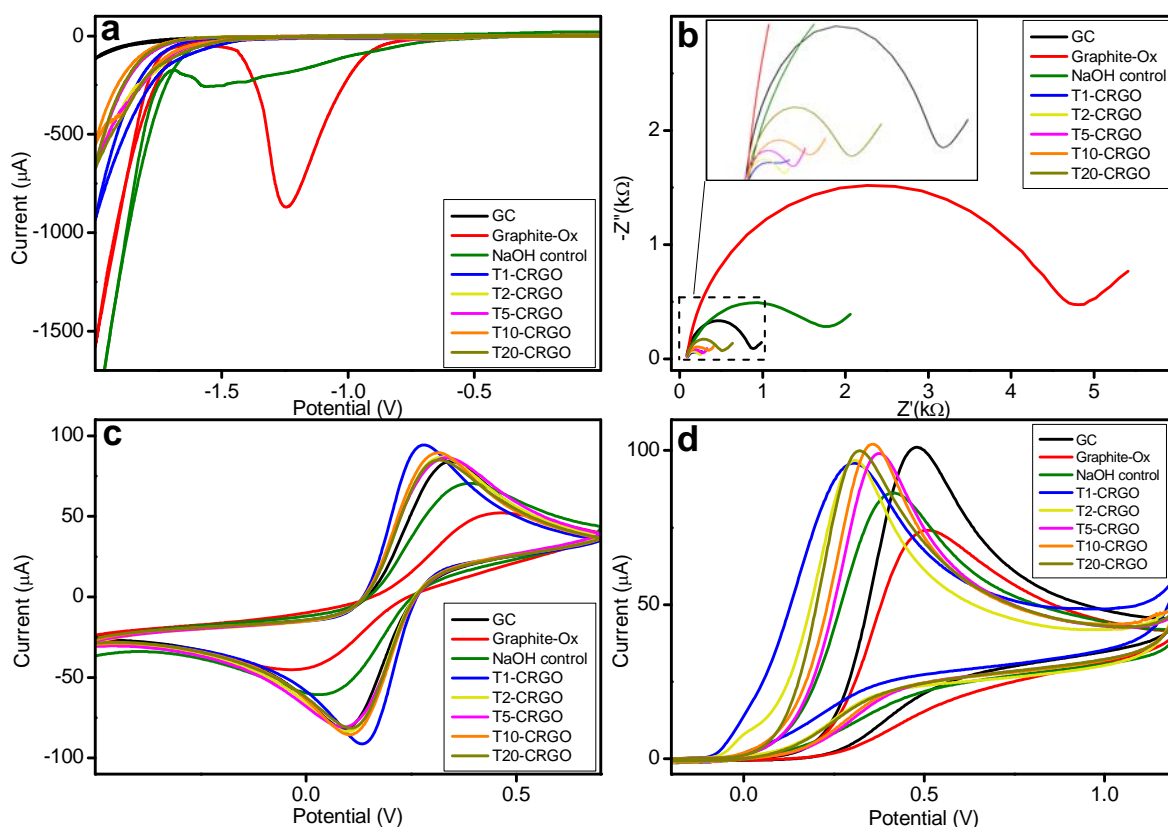

**Fig. S7** Electrochemical characterisations of GC, Graphite-Ox, NaOH control, T1-CRGO, T2-CRGO, T5-CRGO, T10-CRGO, T20-CRGO: (a) Cyclic voltammetric profiles of electrochemical reduction of oxygen containing groups. Conditions: PBS 50 mM, pH 7.2 background electrolyte. Scan rate:  $100 \text{ mV s}^{-1}$ . (b) Nyquist diagrams for EIS measurements. Conditions: PBS 50 mM pH 7.2 background electrolyte,  $10 \text{ mM K}_3[\text{Fe}(\text{CN})_6]/\text{K}_4[\text{Fe}(\text{CN})_6]$ . (c) Cyclic voltammograms on ferro/ferricyanide. Conditions: PBS 50 mM pH 7.2 background electrolyte,  $10 \text{ mM K}_3[\text{Fe}(\text{CN})_6]/\text{K}_4[\text{Fe}(\text{CN})_6]$ . Scan rate:  $100 \text{ mV s}^{-1}$ . (d) Cyclic voltammograms on ascorbic acid. Conditions: PBS 50 mM pH 7.2 background electrolyte,  $5 \text{ mM}$  ascorbic acid. Scan rate:  $100 \text{ mV s}^{-1}$ .
